# Supplementary material
Source: PubMed Central journal article supplement (PMC4720262)
Supplement: NIHMS744333-supplement-01.pdf [file NIHMS744333-supplement-01.pdf]

Appendix A

**Table S1a.** Probability of smoking initiation (Smk=1) by age and race within low-poverty neighborhoods

| Age | White |       |          |          |          |       | Nonwhite |       |          |          |          |       |
|-----|-------|-------|----------|----------|----------|-------|----------|-------|----------|----------|----------|-------|
|     | n     | Smk=1 | Censored | P(Smk=1) | [95% CI] |       | n        | Smk=1 | Censored | P(Smk=1) | [95% CI] |       |
| 5   | 801   | 0     | 19       | 0.000    | .        | .     | 142      | 0     | 6        | 0.000    | .        | .     |
| 6   | 782   | 0     | 9        | 0.000    | .        | .     | 136      | 0     | 2        | 0.000    | .        | .     |
| 7   | 773   | 0     | 12       | 0.000    | .        | .     | 134      | 0     | 3        | 0.000    | .        | .     |
| 8   | 761   | 0     | 15       | 0.000    | .        | .     |          |       |          |          |          |       |
| 9   | 746   | 3     | 9        | 0.004    | 0.001    | 0.010 | 131      | 0     | 2        | 0.000    | .        | .     |
| 10  | 734   | 2     | 12       | 0.003    | 0.000    | 0.008 |          |       |          |          |          |       |
| 11  | 720   | 2     | 12       | 0.003    | 0.000    | 0.008 | 129      | 1     | 2        | 0.008    | 0.000    | 0.029 |
| 12  | 706   | 10    | 10       | 0.014    | 0.007    | 0.024 | 126      | 0     | 4        | 0.000    | .        | .     |
| 13  | 686   | 15    | 5        | 0.022    | 0.012    | 0.034 | 122      | 1     | 5        | 0.008    | 0.000    | 0.030 |
| 14  | 666   | 17    | 10       | 0.026    | 0.015    | 0.039 | 116      | 0     | 2        | 0.000    | .        | .     |
| 15  | 639   | 39    | 9        | 0.061    | 0.043    | 0.082 | 114      | 4     | 0        | 0.035    | 0.010    | 0.077 |
| 16  | 591   | 60    | 8        | 0.102    | 0.078    | 0.129 | 110      | 6     | 5        | 0.055    | 0.020    | 0.106 |
| 17  | 523   | 24    | 6        | 0.046    | 0.029    | 0.066 | 99       | 4     | 2        | 0.040    | 0.011    | 0.089 |
| 18  | 493   | 60    | 8        | 0.122    | 0.093    | 0.154 | 93       | 4     | 5        | 0.043    | 0.012    | 0.094 |
| 19  | 425   | 22    | 105      | 0.052    | 0.032    | 0.076 | 84       | 3     | 21       | 0.036    | 0.007    | 0.086 |
| 20  | 298   | 18    | 120      | 0.060    | 0.036    | 0.091 | 60       | 1     | 13       | 0.017    | 0.000    | 0.062 |
| 21  | 160   | 5     | 54       | 0.031    | 0.010    | 0.064 | 46       | 1     | 15       | 0.022    | 0.001    | 0.080 |
| 22  | 101   | 4     | 30       | 0.040    | 0.011    | 0.087 | 30       | 3     | 6        | 0.100    | 0.021    | 0.241 |
| 23  | 67    | 1     | 12       | 0.015    | 0.000    | 0.055 | 21       | 0     | 4        | 0.000    | .        | .     |
| 24  | 54    | 0     | 7        | 0.000    | .        | .     | 17       | 0     | 1        | 0.000    | .        | .     |
| 25  | 47    | 1     | 46       | 0.021    | 0.001    | 0.079 | 16       | 1     | 15       | 0.063    | 0.002    | 0.231 |

**Table S1b.** Probability of smoking initiation (Smk=1) by age and race within moderate-poverty neighborhoods

| Age | White |       |          |          |          |       | Nonwhite |       |          |          |          |       |
|-----|-------|-------|----------|----------|----------|-------|----------|-------|----------|----------|----------|-------|
|     | n     | Smk=1 | Censored | P(Smk=1) | [95% CI] |       | n        | Smk=1 | Censored | P(Smk=1) | [95% CI] |       |
| 5   | 376   | 0     | 8        | 0.000    | .        | .     | 233      | 0     | 11       | 0.000    | .        | .     |
| 6   | 368   | 0     | 9        | 0.000    | .        | .     | 222      | 0     | 7        | 0.000    | .        | .     |
| 7   | 359   | 0     | 7        | 0.000    | .        | .     | 215      | 0     | 5        | 0.000    | .        | .     |
| 8   | 352   | 0     | 9        | 0.000    | .        | .     | 210      | 0     | 12       | 0.000    | .        | .     |
| 9   | 343   | 1     | 6        | 0.003    | 0.000    | 0.011 | 198      | 0     | 6        | 0.000    | .        | .     |
| 10  | 336   | 2     | 9        | 0.006    | 0.001    | 0.017 | 192      | 0     | 11       | 0.000    | .        | .     |
| 11  | 325   | 1     | 4        | 0.003    | 0.000    | 0.011 | 181      | 1     | 5        | 0.006    | 0.000    | 0.020 |
| 12  | 320   | 8     | 5        | 0.025    | 0.011    | 0.045 | 175      | 3     | 5        | 0.017    | 0.004    | 0.041 |
| 13  | 307   | 12    | 6        | 0.039    | 0.020    | 0.064 | 167      | 4     | 7        | 0.024    | 0.007    | 0.053 |
| 14  | 289   | 10    | 4        | 0.035    | 0.017    | 0.059 | 156      | 3     | 2        | 0.019    | 0.004    | 0.046 |
| 15  | 275   | 15    | 4        | 0.055    | 0.031    | 0.085 | 151      | 7     | 3        | 0.046    | 0.019    | 0.087 |
| 16  | 256   | 25    | 4        | 0.098    | 0.063    | 0.140 | 141      | 10    | 3        | 0.071    | 0.034    | 0.121 |
| 17  | 227   | 17    | 6        | 0.075    | 0.044    | 0.115 | 128      | 9     | 6        | 0.070    | 0.032    | 0.123 |
| 18  | 204   | 30    | 5        | 0.147    | 0.099    | 0.204 | 113      | 10    | 1        | 0.088    | 0.042    | 0.151 |
| 19  | 169   | 15    | 35       | 0.089    | 0.050    | 0.139 | 102      | 4     | 17       | 0.039    | 0.011    | 0.086 |
| 20  | 119   | 5     | 31       | 0.042    | 0.014    | 0.086 | 81       | 3     | 13       | 0.037    | 0.008    | 0.089 |
| 21  | 83    | 2     | 17       | 0.024    | 0.003    | 0.067 | 65       | 4     | 9        | 0.062    | 0.017    | 0.135 |
| 22  | 64    | 1     | 17       | 0.016    | 0.000    | 0.058 | 52       | 1     | 4        | 0.019    | 0.001    | 0.071 |
| 23  | 46    | 0     | 2        | 0.000    | .        | .     | 47       | 3     | 6        | 0.064    | 0.013    | 0.154 |
| 24  | 44    | 0     | 3        | 0.000    | .        | .     | 38       | 1     | 2        | 0.026    | 0.001    | 0.097 |
| 25  | 41    | 1     | 40       | 0.024    | 0.001    | 0.090 | 35       | 2     | 33       | 0.057    | 0.007    | 0.159 |

**Table S1c.** Probability of smoking initiation (Smk=1) by age and race within high-poverty neighborhoods

| Age | White |       |          |          |          |       | Nonwhite |       |          |          |          |       |
|-----|-------|-------|----------|----------|----------|-------|----------|-------|----------|----------|----------|-------|
|     | n     | Smk=1 | Censored | P(Smk=1) | [95% CI] |       | n        | Smk=1 | Censored | P(Smk=1) | [95% CI] |       |
| 5   | 136   | 0     | 3        | 0.000    | .        | .     | 433      | 0     | 19       | 0.000    | .        | .     |
| 6   | 133   | 0     | 5        | 0.000    | .        | .     | 414      | 0     | 15       | 0.000    | .        | .     |
| 7   | 128   | 1     | 6        | 0.008    | 0.000    | 0.029 | 399      | 0     | 14       | 0.000    | .        | .     |
| 8   | 121   | 0     | 5        | 0.000    | .        | .     | 385      | 0     | 11       | 0.000    | .        | .     |
| 9   | 116   | 1     | 3        | 0.009    | 0.000    | 0.032 | 374      | 0     | 16       | 0.000    | .        | .     |
| 10  | 112   | 2     | 3        | 0.018    | 0.002    | 0.050 | 358      | 1     | 14       | 0.003    | 0.000    | 0.010 |
| 11  | 107   | 1     | 2        | 0.009    | 0.000    | 0.035 | 343      | 0     | 14       | 0.000    | .        | .     |
| 12  | 104   | 5     | 1        | 0.048    | 0.016    | 0.099 | 329      | 5     | 13       | 0.015    | 0.005    | 0.031 |
| 13  | 98    | 2     | 1        | 0.020    | 0.003    | 0.057 | 311      | 6     | 13       | 0.019    | 0.007    | 0.038 |
| 14  | 95    | 4     | 0        | 0.042    | 0.012    | 0.092 | 292      | 2     | 11       | 0.007    | 0.001    | 0.019 |
| 15  | 91    | 5     | 3        | 0.055    | 0.018    | 0.113 | 279      | 9     | 12       | 0.032    | 0.015    | 0.057 |
| 16  | 83    | 6     | 0        | 0.072    | 0.027    | 0.141 | 258      | 15    | 7        | 0.058    | 0.033    | 0.091 |
| 17  | 77    | 11    | 1        | 0.143    | 0.071    | 0.239 | 236      | 14    | 8        | 0.059    | 0.032    | 0.094 |
| 18  | 65    | 8     | 1        | 0.123    | 0.053    | 0.222 | 214      | 23    | 10       | 0.107    | 0.068    | 0.156 |
| 19  | 56    | 4     | 19       | 0.071    | 0.020    | 0.157 | 181      | 6     | 33       | 0.033    | 0.012    | 0.065 |
| 20  | 33    | 3     | 8        | 0.091    | 0.019    | 0.219 | 142      | 5     | 31       | 0.035    | 0.011    | 0.072 |
| 21  | 22    | 4     | 3        | 0.182    | 0.050    | 0.399 | 106      | 6     | 21       | 0.057    | 0.021    | 0.110 |
| 22  | 15    | 0     | 2        | 0.000    | .        | .     | 79       | 3     | 11       | 0.038    | 0.008    | 0.092 |
| 23  | 13    | 0     | 1        | 0.000    | .        | .     | 65       | 0     | 12       | 0.000    | .        | .     |
| 24  | 12    | 0     | 2        | 0.000    | .        | .     | 53       | 1     | 6        | 0.019    | 0.001    | 0.070 |
| 25  | 10    | 1     | 9        | 0.100    | 0.003    | 0.369 | 46       | 2     | 44       | 0.043    | 0.005    | 0.121 |

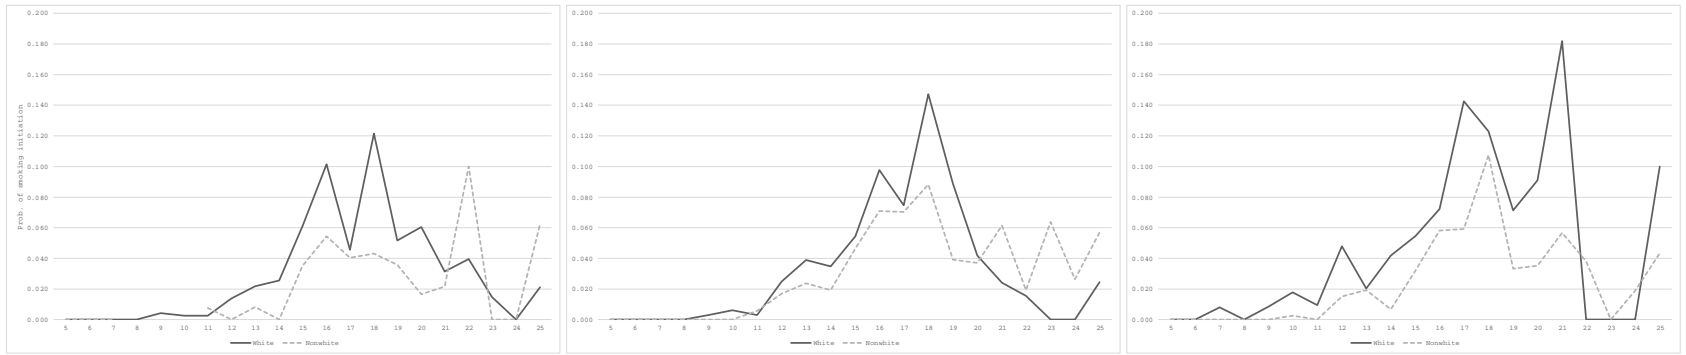

Figure S1. Probability of smoking initiation by age and race within low-, moderate-, and high-poverty neighborhoods, respectively

## Appendix B

**Table S1.** IPT-w eighted discrete-time logit models for the effects of neighborhood poverty on the risk of smoking initiation by age 25, including controls for neighborhood racial composition

|                                            | Nonw hite |           | White |            |     |
|--------------------------------------------|-----------|-----------|-------|------------|-----|
|                                            | OR        | 95% CI    | OR    | 95% CI     |     |
| NH poverty, cumulative proportion (low )   |           |           |       |            |     |
| Moderate                                   | 1.35      | 0.56-3.25 | 1.24  | 0.80-1.91  |     |
| High                                       | 2.07      | 0.85-5.04 | 2.15  | 1.17-3.95  | **  |
| Age                                        | 5.55      | 3.45-8.94 | 7.37  | 5.08-10.68 | *** |
| Age squared                                | 0.96      | 0.94-0.97 | 0.95  | 0.930-0.96 | *** |
| Proportion NH nonw hite                    | 0.53      | 0.25-1.11 | 0.63  | 0.32-1.22  |     |
| Gender (male)                              |           |           |       |            |     |
| Female                                     | 0.79      | 0.57-1.10 | 0.86  | 0.71-1.06  |     |
| Birthw eight (88 ounces or more)           |           |           |       |            |     |
| Less than 88 ounces                        | 0.80      | 0.39-1.67 | 0.69  | 0.41-1.16  |     |
| Mother's marital status at birth (married) |           |           |       |            |     |
| Unmarried                                  | 1.02      | 0.65-1.60 | 0.92  | 0.53-1.60  |     |
| Mother's age at birth                      | 1.00      | 0.96-1.04 | 0.98  | 0.96-1.01  |     |
| HH's education at age 4 (less than HS)     |           |           |       |            |     |
| High school graduate                       | 0.91      | 0.59-1.41 | 0.59  | 0.43-0.80  | *** |
| At least some college                      | 1.02      | 0.58-1.79 | 0.41  | 0.30-0.57  | *** |
| NH poverty at age 4 (low )                 |           |           |       |            |     |
| Moderate                                   | 0.81      | 0.37-1.77 | 0.92  | 0.66-1.28  |     |
| High                                       | 0.97      | 0.44-2.14 | 0.78  | 0.54-1.13  |     |
| HH's marital status at age 4 (married)     |           |           |       |            |     |
| Unmarried                                  | 1.26      | 0.80-1.97 | 1.13  | 0.66-1.93  |     |
| HH's employment status at age 4 (employed) |           |           |       |            |     |
| Unemployed                                 | 0.94      | 0.56-1.58 | 0.67  | 0.39-1.14  |     |
| Homeow nership at age 4 (ow ns home)       |           |           |       |            |     |
| Does not ow n home                         | 1.43      | 0.95-2.15 | 1.12  | 0.88-1.42  | *   |
| Family size at age 4                       | 0.95      | 0.87-1.04 | 0.99  | 0.88-1.10  |     |
| Public assistance receipt at age 4 (none)  |           |           |       |            |     |
| Received public assistance                 | 2.16      | 1.39-3.37 | 1.18  | 0.53-2.61  | *** |
| Household income at age 4                  | 1.11      | 0.81-1.53 | 1.01  | 0.87-1.18  |     |
| HH's w ork hours per week at age 4         | 1.01      | 1.00-1.02 | 0.99  | 0.98-1.00  | *   |
| Year born (1966-1969)                      |           |           |       |            |     |
| 1970-1974                                  | 0.69      | 0.38-1.28 | 0.97  | 0.71-1.34  |     |
| 1975-1979                                  | 0.98      | 0.54-1.78 | 1.40  | 1.01-1.94  | **  |
| 1980-1984                                  | 1.40      | 0.80-2.45 | 1.22  | 0.87-1.70  |     |
| 1985-1989                                  | 1.13      | 0.54-2.33 | 0.72  | 0.46-1.12  |     |
| 1990-1993                                  | 0.48      | 0.05-4.51 | 0.40  | 0.06-2.66  |     |

Odds ratios (OR) and 95% confidence intervals (CI) are combined estimates from five multiple imputation datasets

NH=Neighborhood; HH=Household head

\*p<0.10; \*\*p<0.05; \*\*\*p<0.01
